# Supplementary material for: Hyperglycemia enhances pancreatic cancer progression accompanied by elevations in phosphorylated STAT3 and MYC levels
Source: PubMed Central journal article supplement (PMC7329089; doi:10.1371/journal.pone.0235573), 2020-07-01

## Raw Data of Gel blots

Raw Data of figures below are shown in order. All blots were captured with high sensitivity mode of FUSION Solo S (Vilber Lourmat, Collégien, France) .

Fig 3A PANC-1, Fig 3A mPKC1, Fig 3A BxPC3

Fig 4A PANC-1, Fig 4B mPKC1

Fig 5A PANC-1, Fig 5A mPKC1

S2. Fig C PANC-1 mPKC1, S2. Fig C BxPC3

S4. Fig A PANC-1, S4. Fig A mPKC1

Fig 3A PANC-1

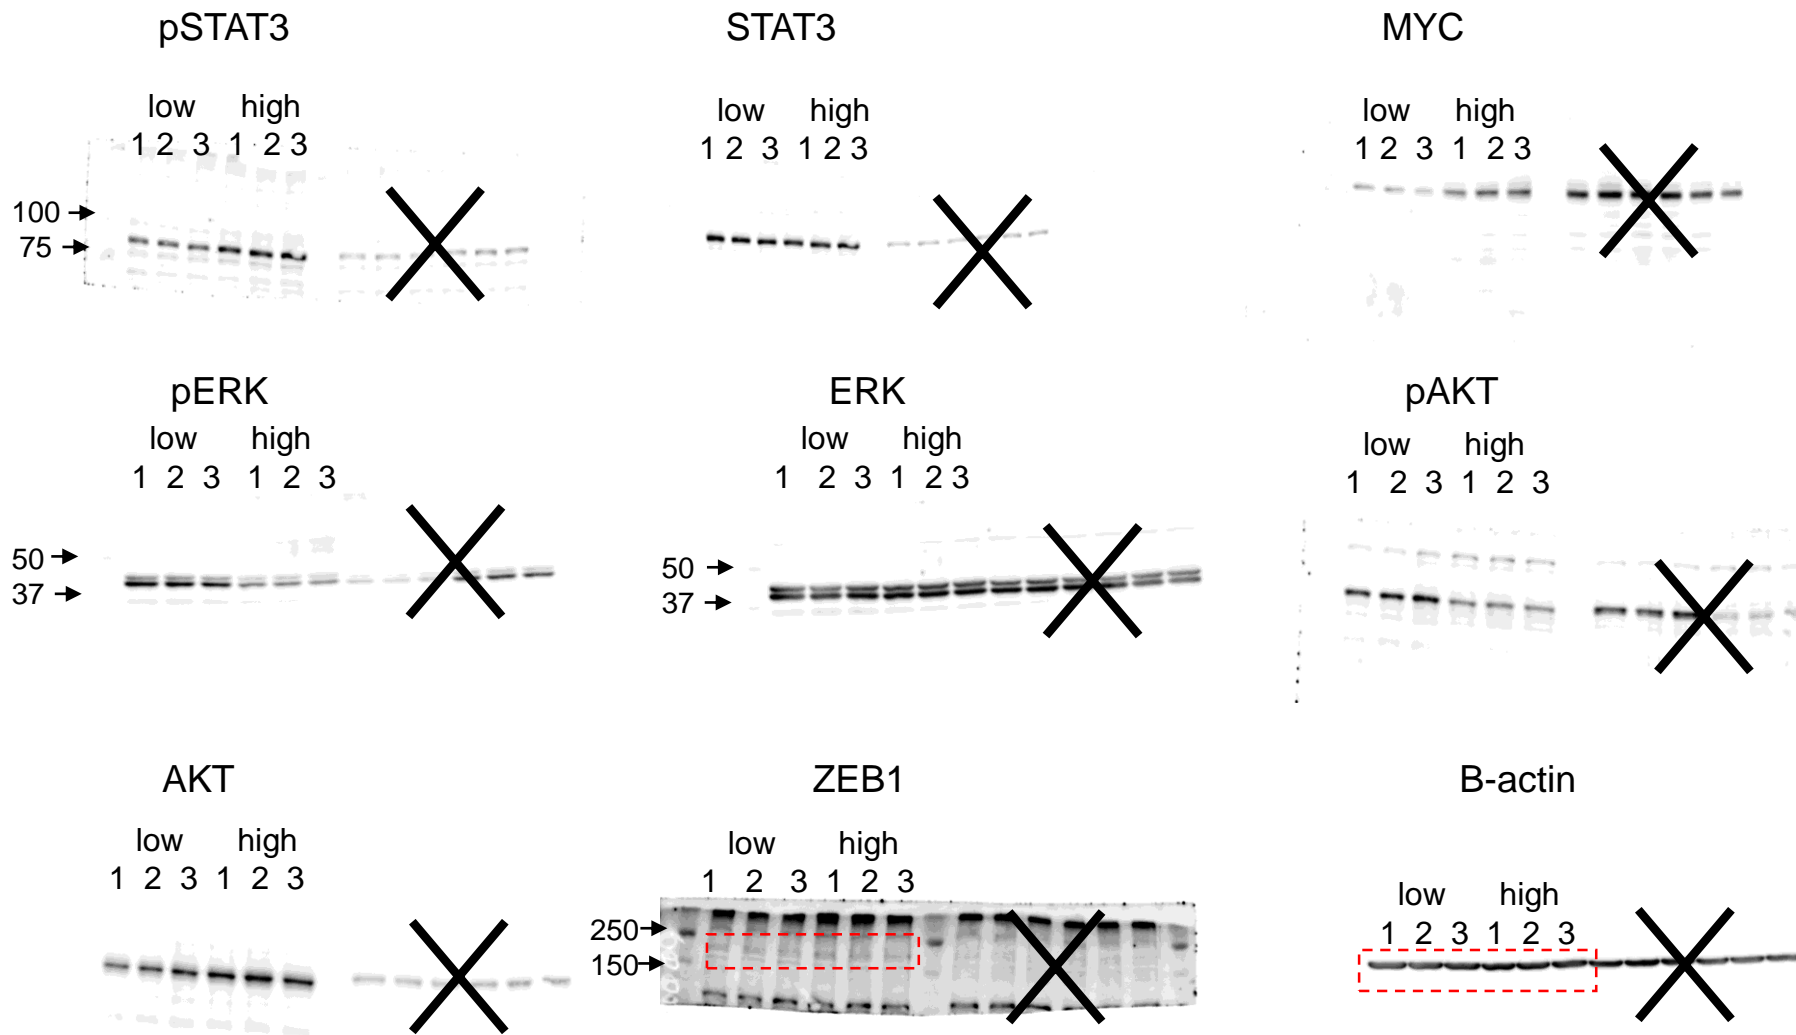

Fig 3A mPKC1

pSTAT3

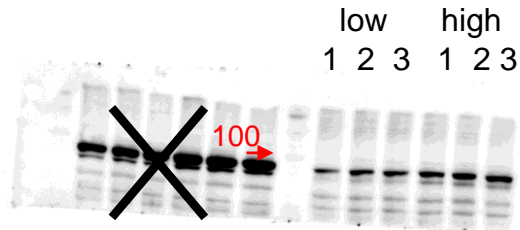

STAT3

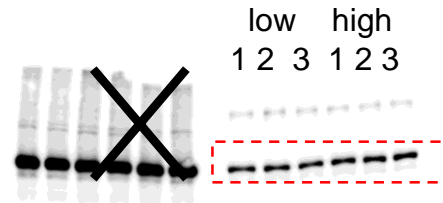

MYC

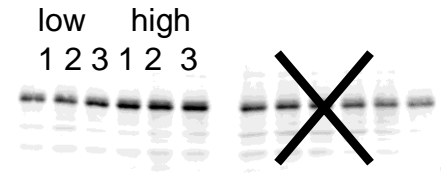

pERK

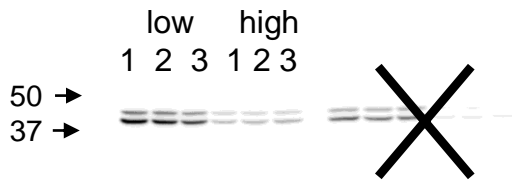

ERK

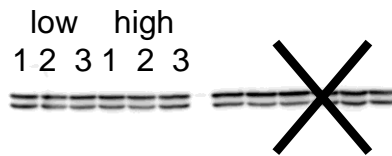

pAKT

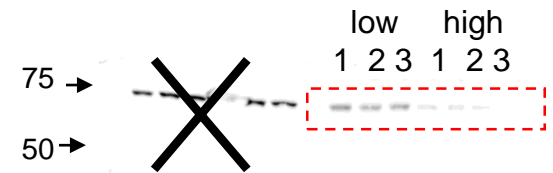

AKT

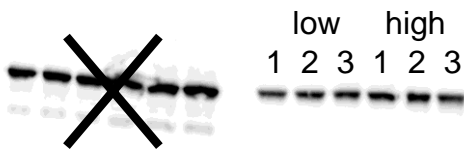

ZEB1

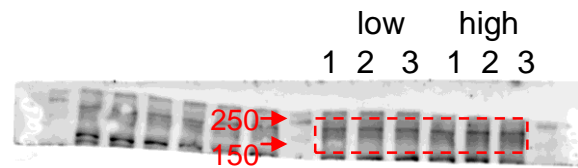

B-actin

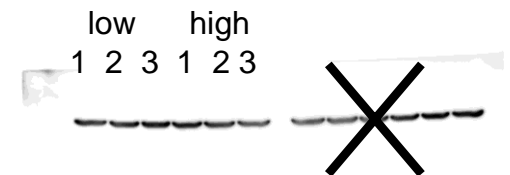

Fig 3A BxPC3

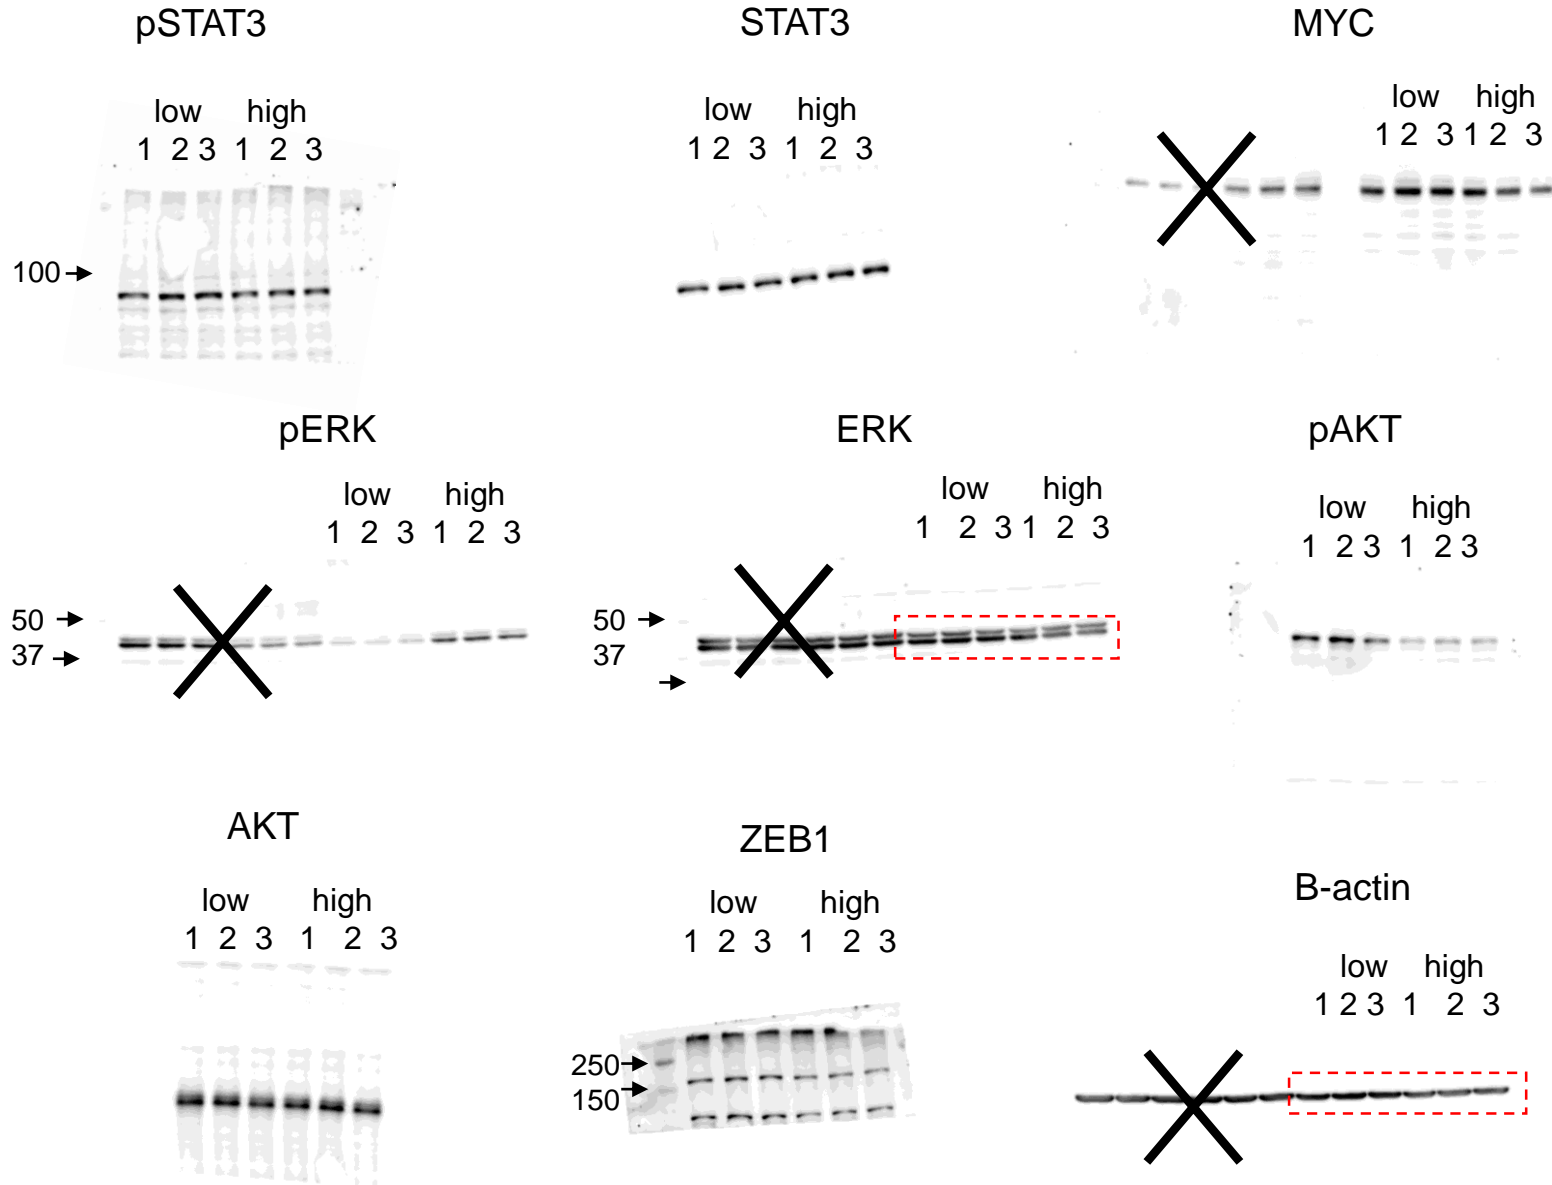

Fig 4A PANC-1

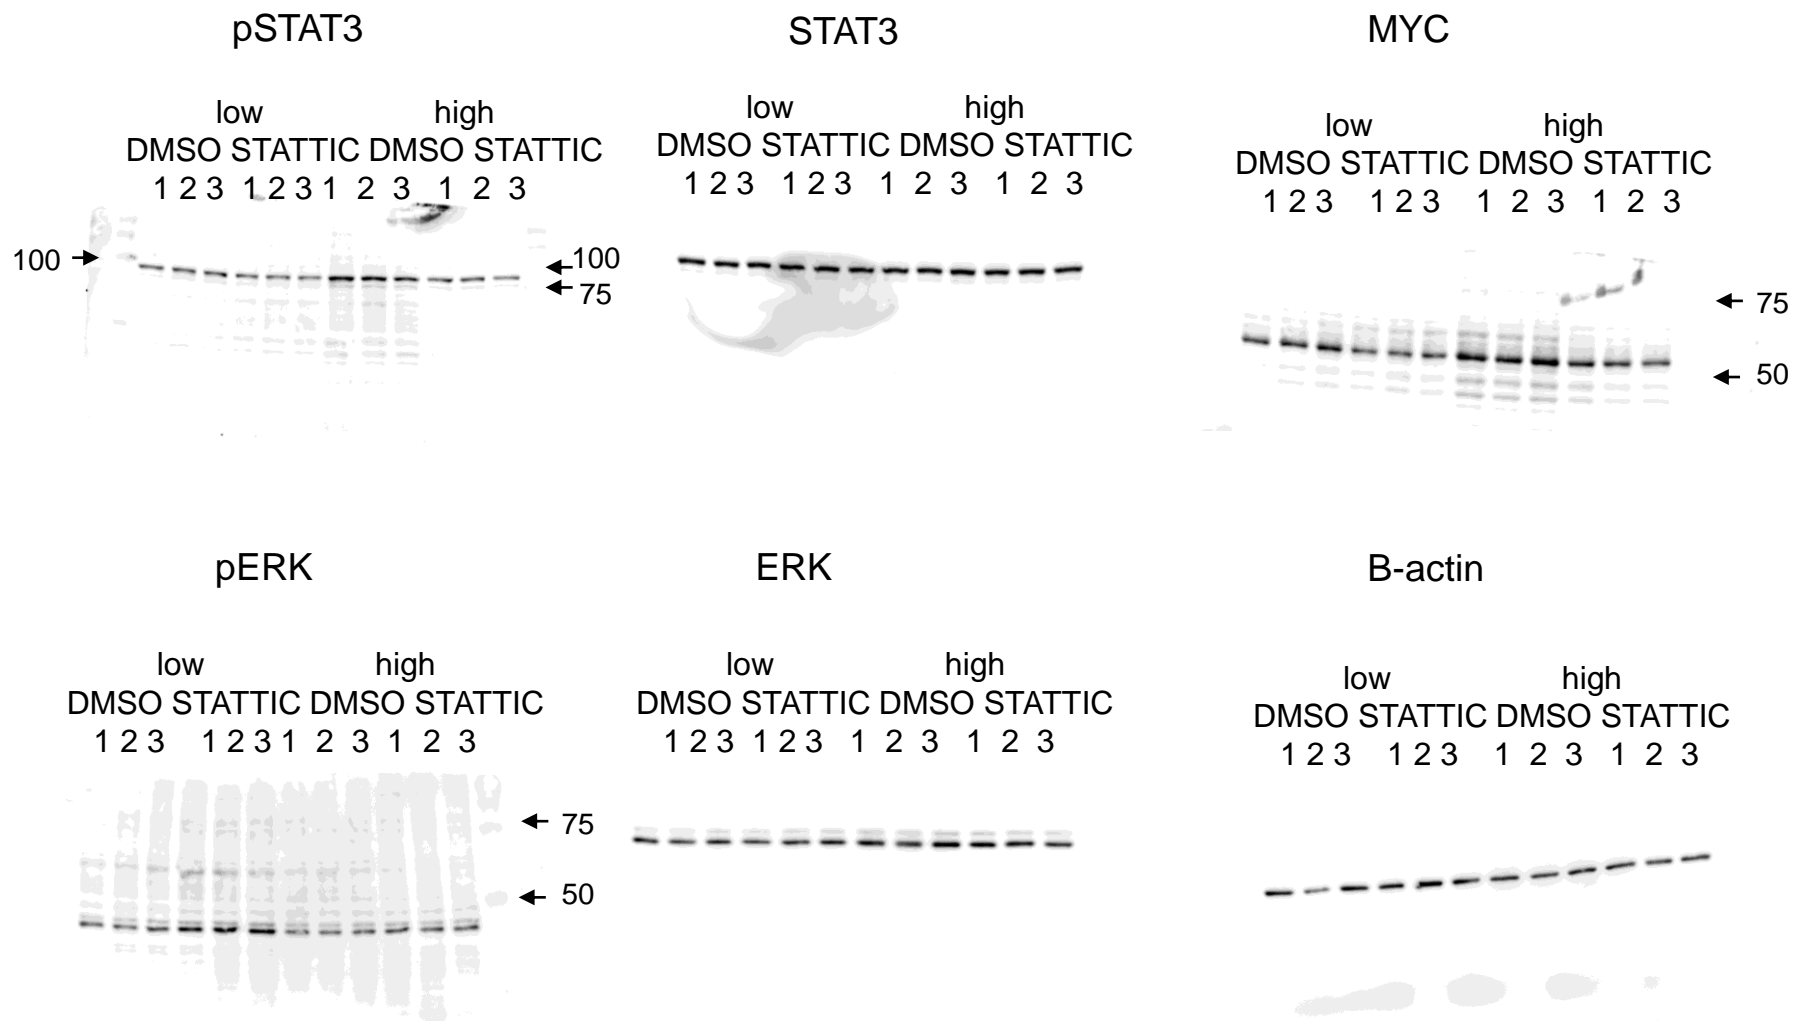

Fig 4B mPKC1

pSTAT3

low high  
DMSO STATTC DMSO STATTC  
1 2 3 1 2 3 1 2 3

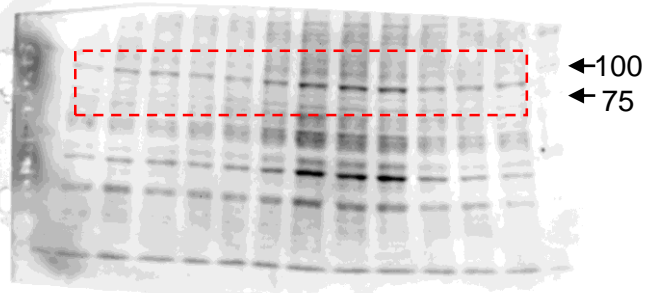

STAT3

low high  
DMSO STATTC DMSO STATTC  
1 2 3 1 2 3 1 2 3

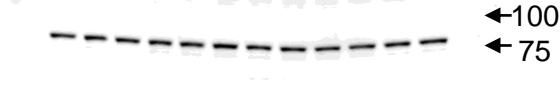

MYC

low high  
DMSO STATTC DMSO STATTC  
1 2 3 1 2 3 1 2 3

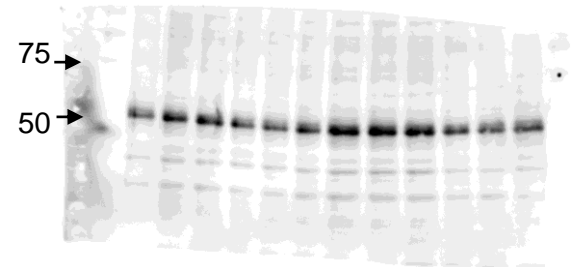

pERK

low high  
DMSO STATTC DMSO STATTC  
1 2 3 1 2 3 1 2 3

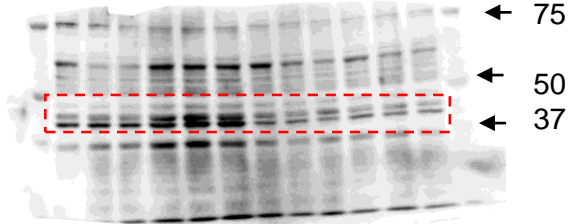

ERK

low high  
DMSO STATTC DMSO STATTC  
1 2 3 1 2 3 1 2 3

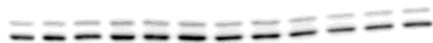

B-actin

low high  
DMSO STATTC DMSO STATTC  
1 2 3 1 2 3 1 2 3

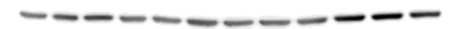

Fig 5A PANC-1

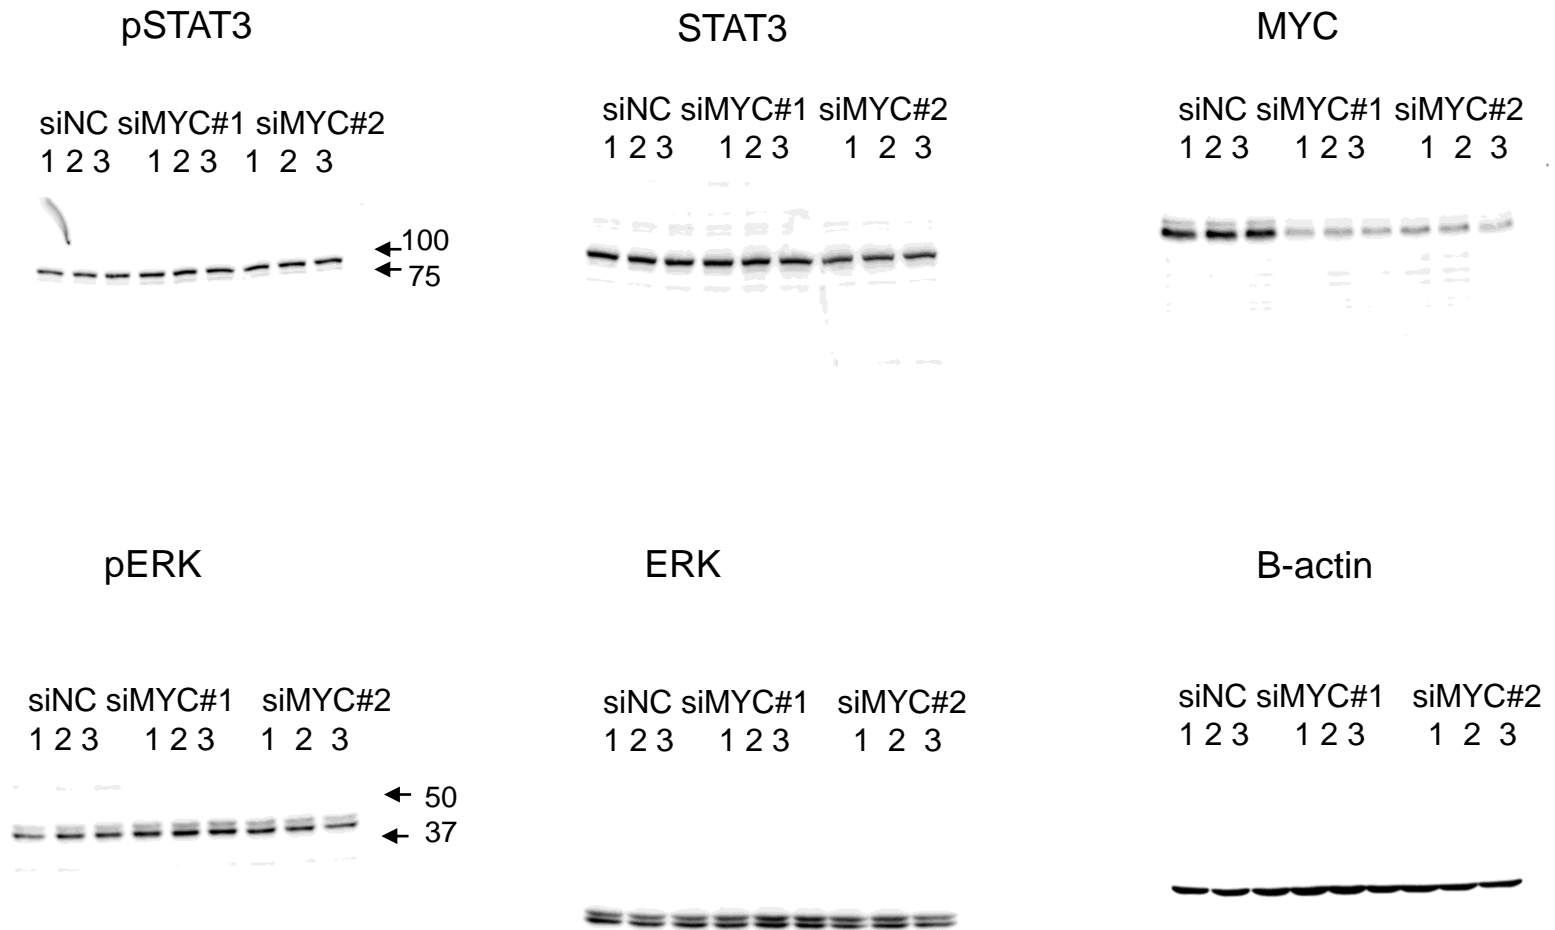

Fig 5A mPKC1

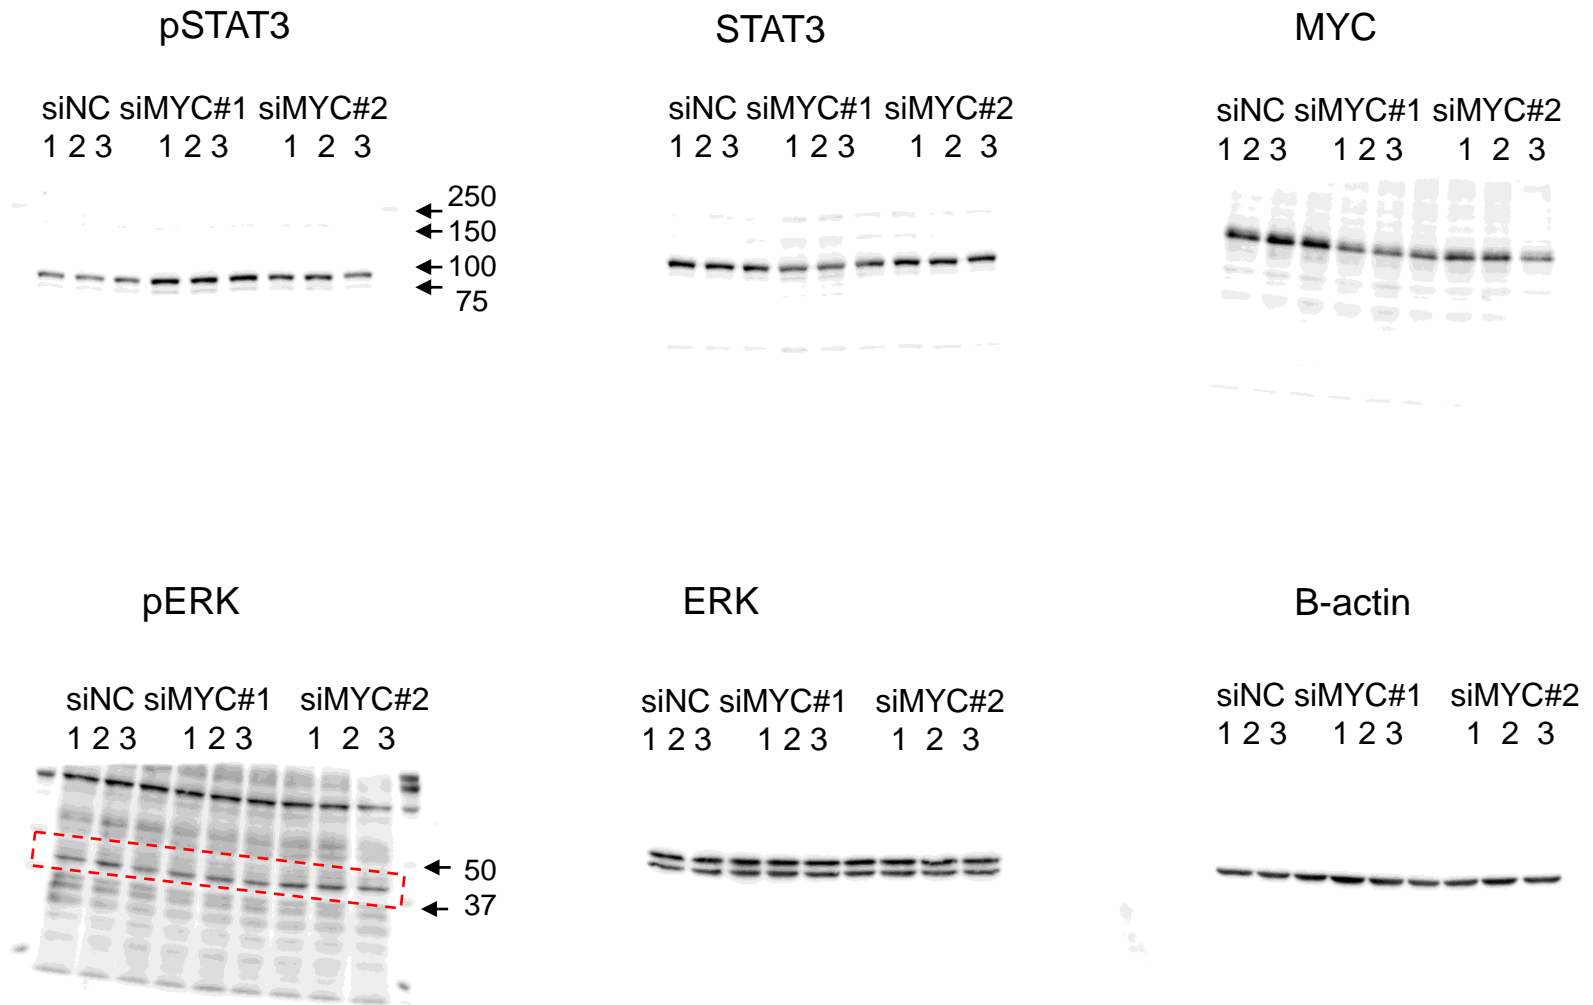



## S2. Fig C PANC-1 mPKC1

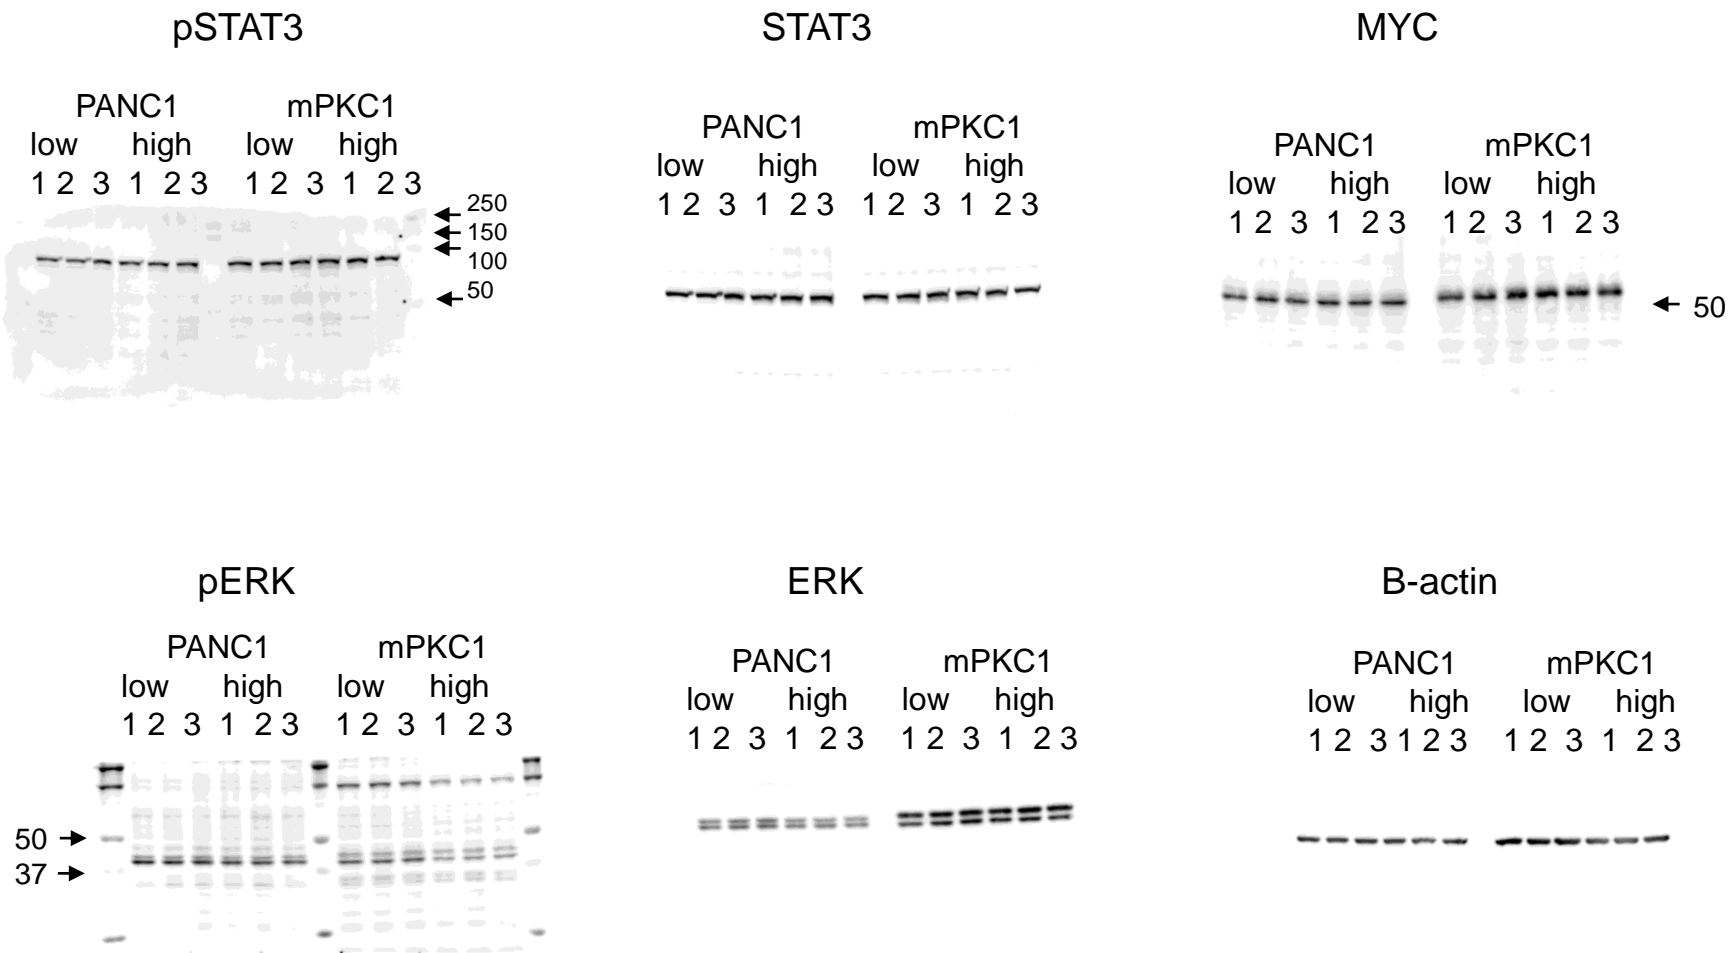

# S2. Fig C BxPC3

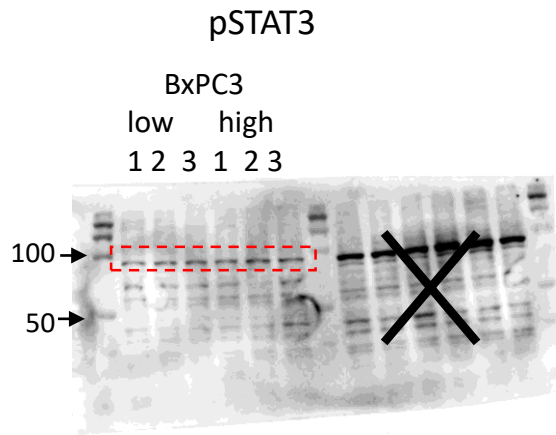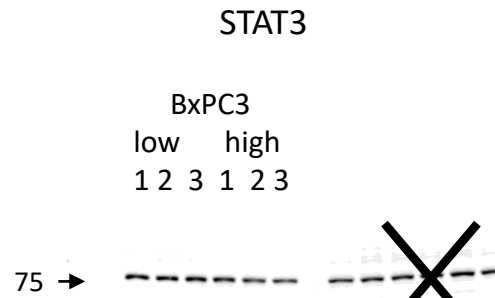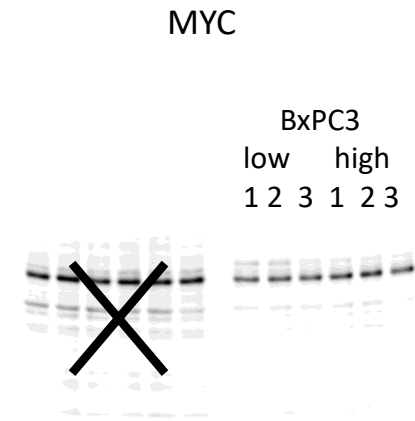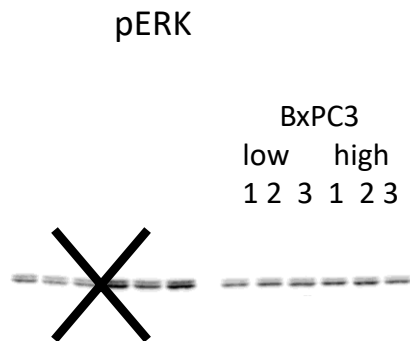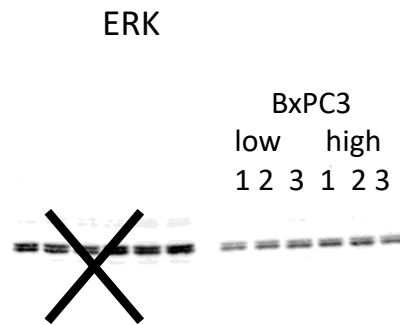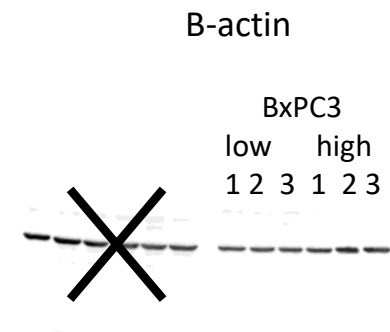

# S4. Fig A PANC-1

pSTAT3

pAKT

pERK

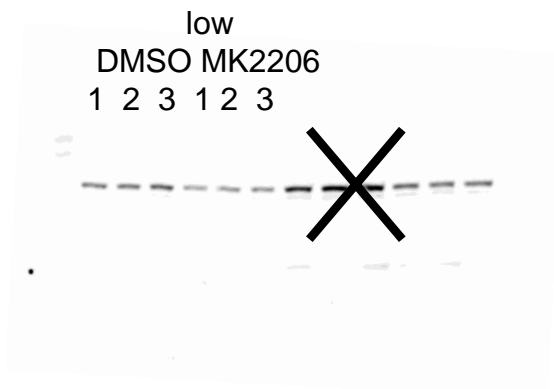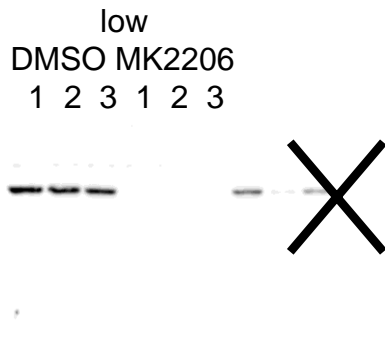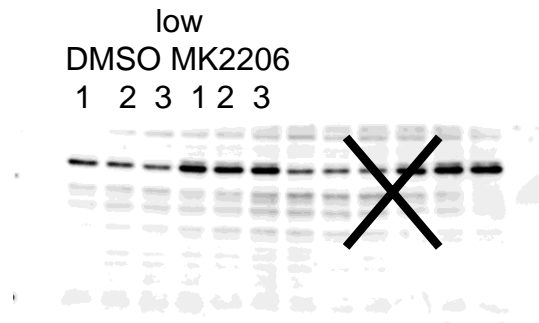

STAT3

AKT

ERK

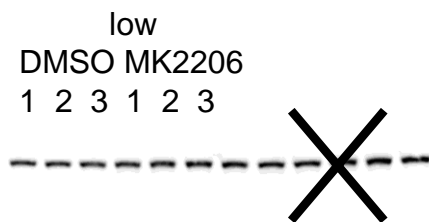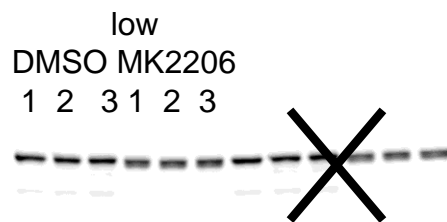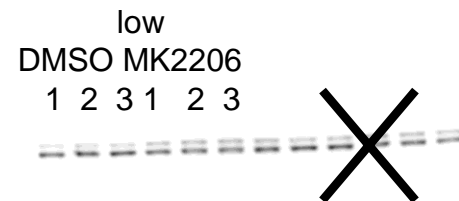

B actin

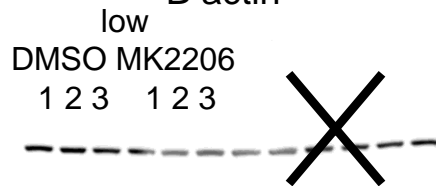

# S4. Fig A mPKC1

pSTAT3

low  
DMSO MK2206  
1 2 3 1 2 3

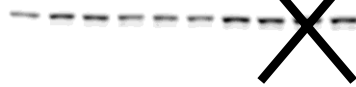

pAKT

low  
DMSO MK2206  
1 2 1 2 3

100 →  
75 →  
50 →

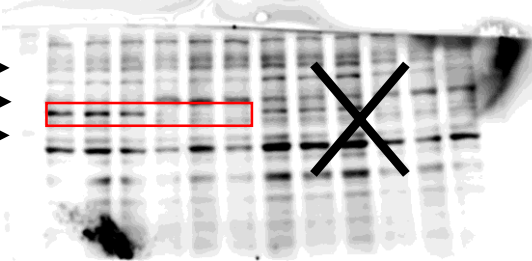

pERK

low  
DMSO MK2206  
1 2 3 1 2 3

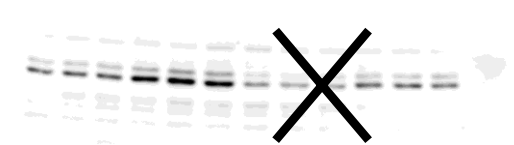

STAT3

low  
DMSO MK2206  
1 2 3 1 2 3

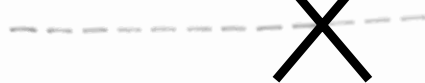

AKT

low  
DMSO MK2206  
1 2 3 1 2 3

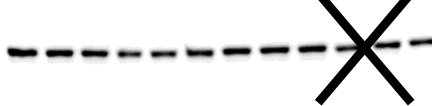

ERK

low  
DMSO MK2206  
1 2 3 1 2 3

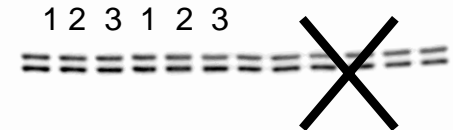

B actin

low  
DMSO MK2206  
1 2 3 1 2 3

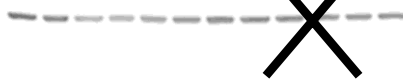

Supplement: pone.0235573.s005.pdf [file pone.0235573.s005.pdf]
